# Supplementary material for: Direction-control of anisotropic electronic behaviors via ferroelasticity in two-dimensional α-MPI (M = Zr, Hf)
Source: Royal Society of Chemistry journal article supplement (doi:10.1039/c9mh00633h), 2019-01-01
Supplement: c9mh00633h1.pdf [file c9mh00633h1.pdf]

## Supporting Information

# Direction-Control of Anisotropic Electronic Behaviors via Ferroelasticity in Two-Dimensional $\alpha$ -MPI (M = Zr, Hf)

Ting Zhang, Yandong Ma,\* Lin Yu, Baibiao Huang, and Ying Dai\*

School of Physics, State Key Laboratory of Crystal Materials, Shandong University,  
Shandan Street 27, Jinan 250100, China

\*Corresponding author: yandong.ma@sdu.edu.cn (Y.M.); daiy60@sina.com

(Y.D.)

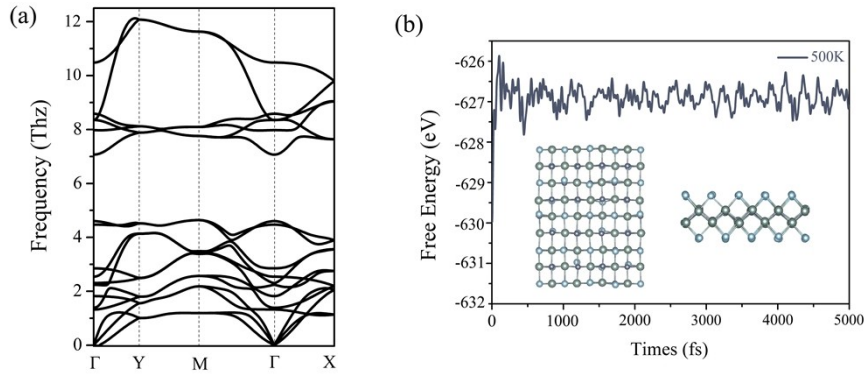

**Fig. S1.** (a) Phonon spectra of SL  $\alpha$ -HfPI. (b) Variation of total energy of SL  $\alpha$ -HfPI with time obtained from AIMD simulation at 500K. Inset in (b) is the snapshot taken from the end of the AIMD simulation.

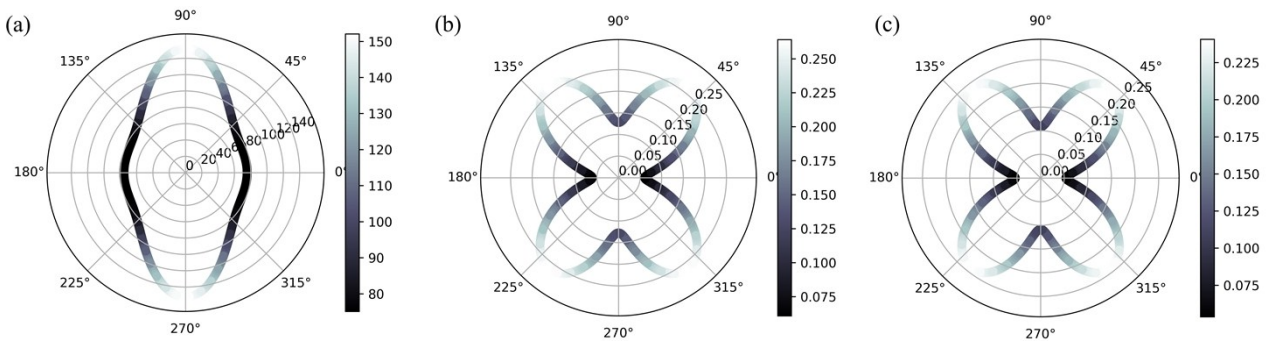

**Fig. S2.** (a) Young's modulus of SL  $\alpha$ -HfPI, (b) Poisson's ratio of SL  $\alpha$ -ZrPI and (c) Poisson's ratio of SL  $\alpha$ -HfPI as a function of the angle  $\theta$  ( $\theta = 0^\circ$  corresponds to the x axis).

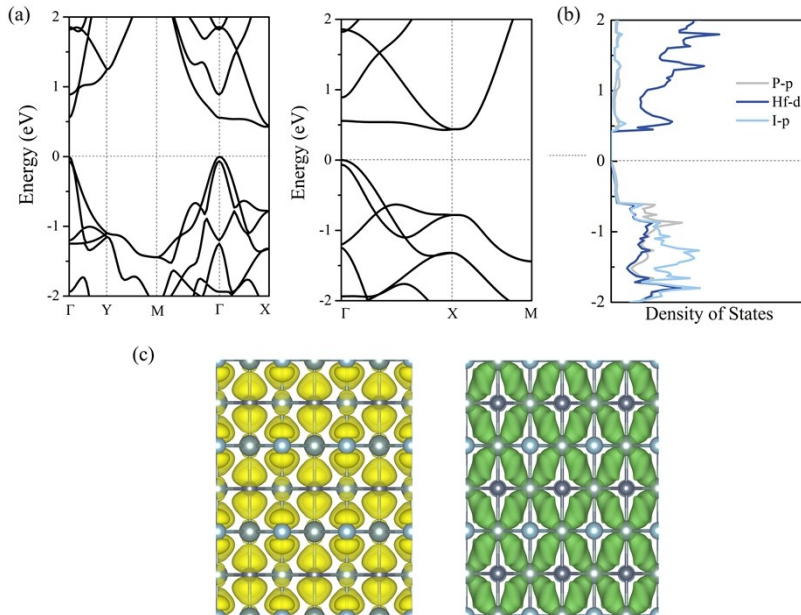

**Fig. S3.** (a) The band structure and (b) projected density of states of SL  $\alpha$ -HfPI. The Fermi level is set to zero. The right panel in (a) shows the band dispersions around CBM. As shown in (a), the CBM locates around the X point instead of the  $\Gamma$  point. The dispersion of the bottom conduction

band along the y direction is rather flat, thus resulting in the large effective mass of electron for  $\alpha$ -HfPI. (c) The partial charge density of VBM (left) at the  $\Gamma$  point and CBM (right) around the X point of SL  $\alpha$ -HfPI.

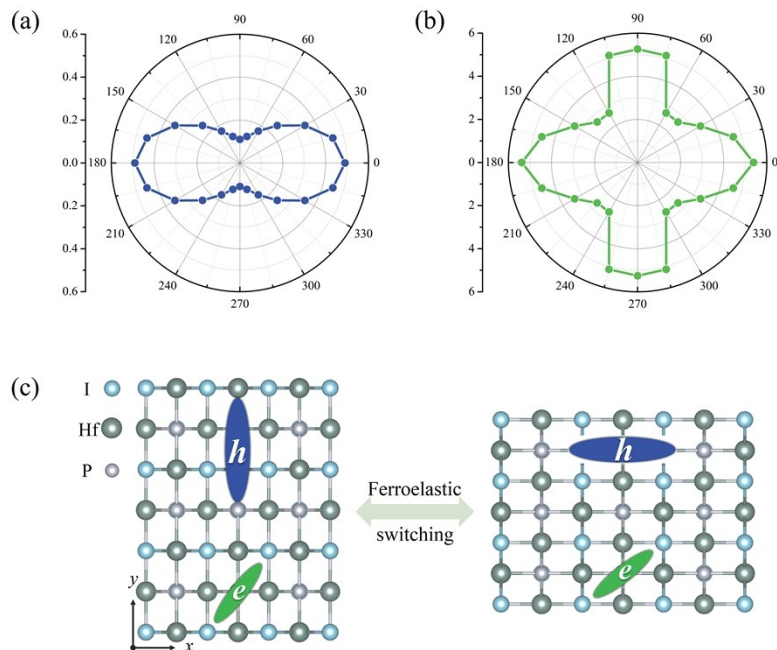

**Fig. S4.** The direction-dependent effective masses of (a) holes and (b) electrons for SL  $\alpha$ -HfPI.  $\theta = 0^\circ$  corresponds to the x axis. (c) The schematic diagram of the anisotropy of carrier transports for SL  $\alpha$ -HfPI controlled by ferroelastic switching. According to the directional electron effective mass in Fig. S4(b), electrons of SL  $\alpha$ -HfPI prefer to transport along  $\Gamma$ -M direction, rather than along x or y direction. The electron mobility along M direction is  $3.24 \times 10^2 \text{ cm}^2 \text{ V}^{-1} \text{ s}^{-1}$ .

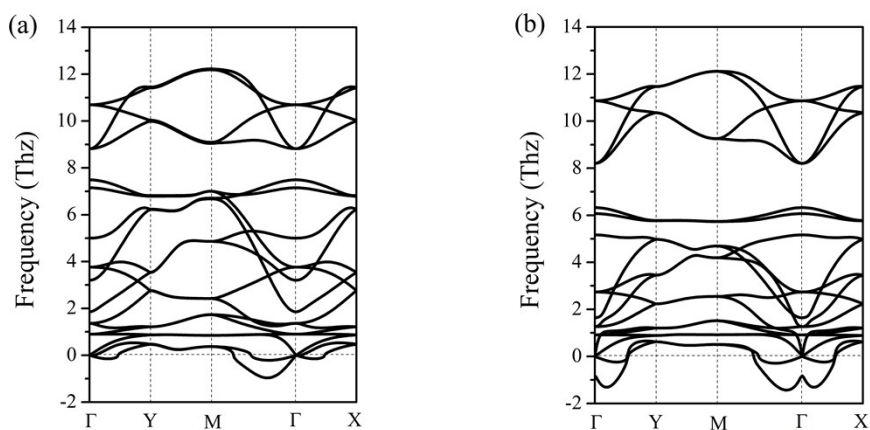

**Fig. S5.** Phonon spectra of (a) SL  $\alpha$ -ZrPI and (b) SL  $\alpha$ -HfPI with the intermediate square lattice.

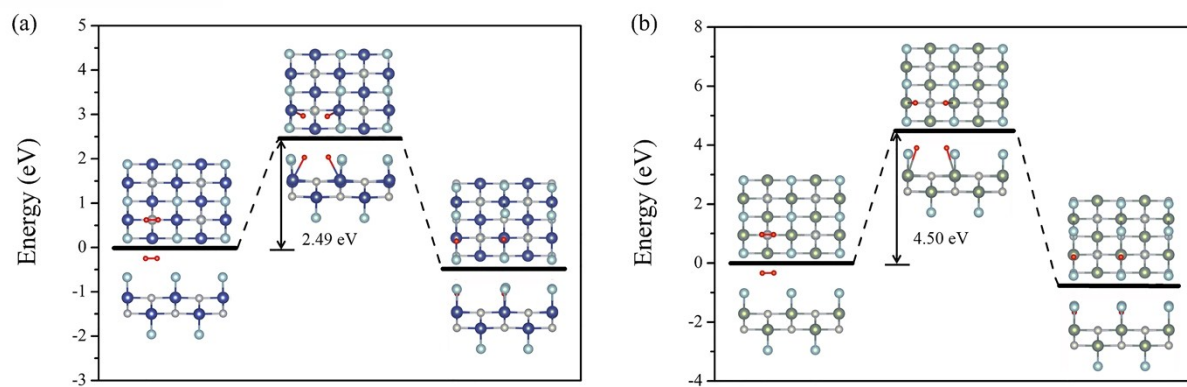

**Fig. S6.** The energy barrier for a physisorbed O<sub>2</sub> molecule to dissociate and chemisorb on the surface of (a) SL  $\alpha$ -ZrPI and (b) SL  $\alpha$ -HfPI.
